# Supplementary material
Source: HighWire-hosted journal article supplement (https://cmaj.ca/highwire/filestream/58727/field_highwire_adjunct_files/1/what-kanani-2-at.pdf)
Supplement: what-kanani-2-at.pdf [file what-kanani-2-at.pdf]

**Appendix 2: Specific Bible passages of importance to a 15-year-old Jehovah's Witness who refused a blood transfusion<sup>1</sup>**

- "For the holy spirit and we ourselves have favored adding no further burden to YOU, except these necessary things, to keep abstaining from things sacrificed to idols and from blood and from things strangled and from fornication. If YOU carefully keep yourselves from these things, YOU will prosper. Good health to YOU!" — Acts 15:28,29
- "As for any man of the house of Israel or some alien resident who is residing as an alien in YOUR midst who eats any sort of blood, I shall certainly set my face against the soul that is eating the blood, and I shall indeed cut him off from among his people. For the soul of the flesh is in the blood, and I myself have put it upon the altar for YOU to make atonement for YOUR souls, because it is the blood that makes atonement by the soul [in it]. That is why I have said to the sons of Israel: 'No soul of YOU must eat blood and no alien resident who is residing as an alien in YOUR midst should eat blood.'" — Leviticus 17:10–12
- "Every moving animal that is alive may serve as food for YOU. As in the case of green vegetation, I do give it all to YOU. Only flesh with its soul — its blood — YOU must not eat. And, besides that, YOUR blood of YOUR souls shall I ask back. From the hand of every living creature shall I ask it back; and from the hand of man, from the hand of each one who is his brother, shall I ask back the soul of man." — Genesis 9:3–5

**Reference**

1. *New world translation of the Holy Scriptures*. Watch Tower Bible and Tract Society of Pennsylvania; 2010. Available: [www.watchtower.org/e/publications/index.htm](http://www.watchtower.org/e/publications/index.htm) (accessed 2010 June 6).
